# Supplementary material for: Polycyclic aromatic hydrocarbons (PAHs) in Chinese forest soils: profile composition, spatial variations and source apportionment
Source: PubMed Central journal article supplement (PMC5457447; doi:10.1038/s41598-017-02999-0), 2017-06-02
Supplement: 41598_2017_2999_MOESM1_ESM.pdf [file 41598_2017_2999_MOESM1_ESM.pdf]

## Supporting Information

### Polycyclic aromatic hydrocarbons (PAH) in Chinese forest soils: profile composition, spatial variations and source apportionment

*Jabir Hussain Syed<sup>1\*</sup>, Mehreen Iqbal<sup>2</sup>, Guangcai Zhong<sup>1</sup>, Athanasios Katsoyiannis<sup>3</sup>, Ishwar Chandra Yadav<sup>1</sup>, Jun Li<sup>1</sup>, Gan Zhang<sup>1</sup>*

<sup>1</sup>State Key Laboratory of Organic Geochemistry, Guangzhou Institute of Geochemistry 510640, Chinese Academy of Sciences, Guangzhou, China

<sup>2</sup>Environmental Biology and Ecotoxicology Laboratory, Department of Environmental Sciences, Faculty of Biological Sciences, Quaid-I-Azam University, Islamabad 45320, Pakistan

<sup>3</sup>Norwegian Institute for Air Research (NILU) – FRAM High North Research Centre on Climate and the Environment Hjalmar Johansens gt. 14 NO - 9296 Tromsø, Norway

**\*Corresponding Author: Gan Zhang, PhD**

**Address:** State Key Laboratory of Organic Geochemistry, Guangzhou Institute of Geochemistry 510640, Chinese Academy of Sciences, Guangzhou, China

**Email:** [zhanggan@gig.ac.cn](mailto:zhanggan@gig.ac.cn)

Tel: 86 20 8529 1508

Fax: 86 20 8529 0706

#### Contents of this file

**Text S1 to S2**

**Figures S1 to S9**

**Tables S2 to S5**

#### S 1. Statistical methods

In order to identify independent sources tracers (individual components), we used principal component analysis (PCA). The PCA was carried out with varimax rotation (Kaiser-Normalization), and initially the components having eigen values greater than 1 (following Kaiser's rule) were extracted. The influence (and association) of BC and/or TOC on PAHs (individual and sum-components) was analyzed using regression models. All the analyses were carried out with SPSS 18.0 and MS-Excel software, while the geographical distribution of PAHs concentrations in study area was plotted using ArcGIS 9.2 software.

#### S2. BC and TOC analysis

Total organic carbon was analyzed according to the procedure explained by Chen et al. (2009)<sup>1</sup>. In brief, treatment with 10% HCL was carried out for 3g of soil sample which was freeze-dried, ground and sieved, to remove the inorganic carbon, and then samples were washed three times with deionized water, and dried overnight at 60 °C. The overall standard

deviation of measurements was better than 3% (n=3). TOC contents were determined by using the TOC-VCPN with the solid sample module (SSM- 5000A; Shimadzu, Japan).

For black carbon (BC) detection, the chemo-thermal oxidation (CTO-375) method described elsewhere<sup>2,3</sup> was used. Briefly, the dried soil samples (2-3 g) were exposed to thermal oxidation (375 C, 18 h) in a muffle furnace under constraint air flow. They were then digested with 1 N HCL<sup>4</sup>. The residual organic carbon content was determined as BC by using a TOC analyzer (SSM- 5000A; Shimadzu, Japan).

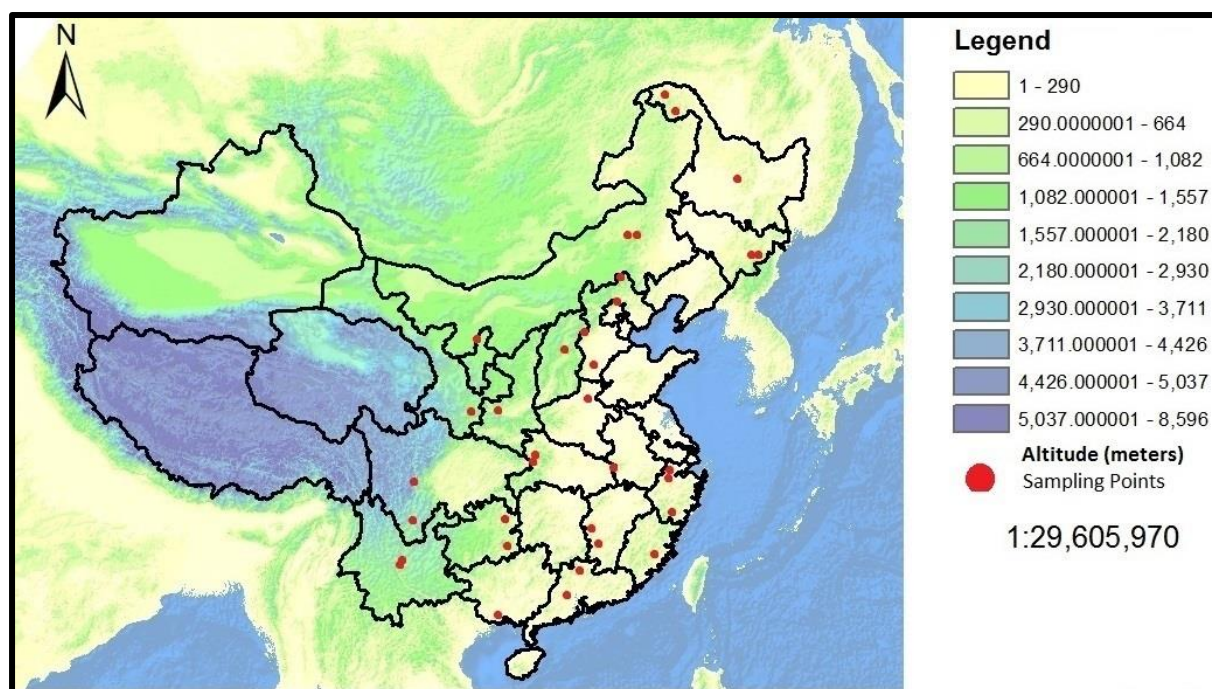

**Figure S1: Altitudinal map displaying sampling sites across the forests of China. (The background map was made using ArcGIS 9.3 by one co-author)**

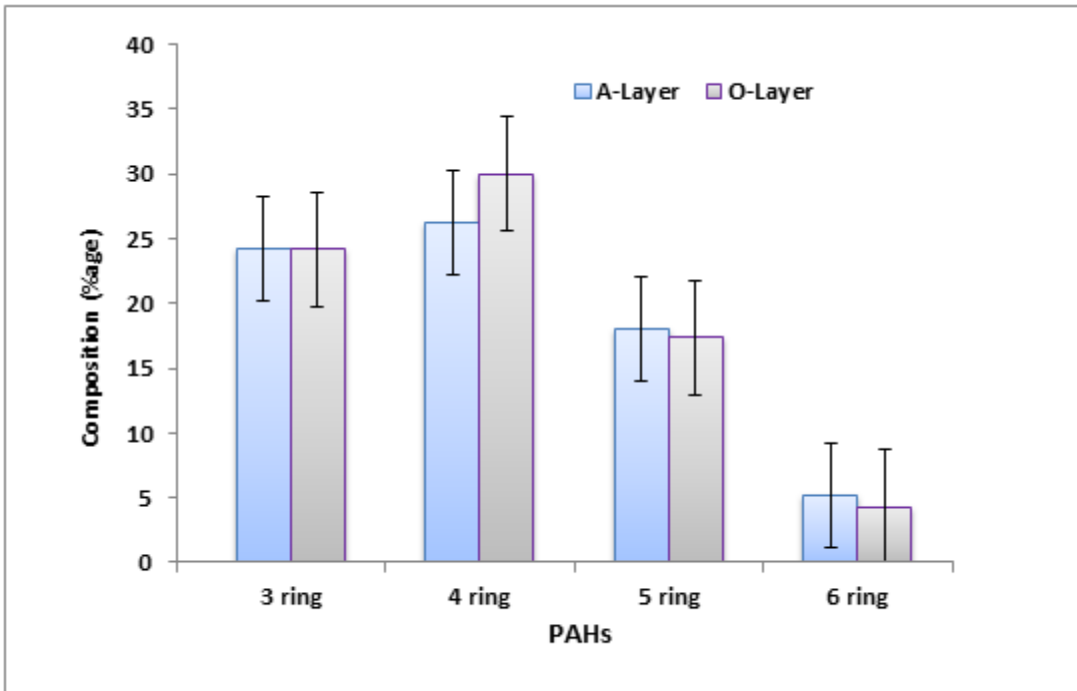

**Figure S2: Composition profile of total PAHs (O- & A-horizon)**

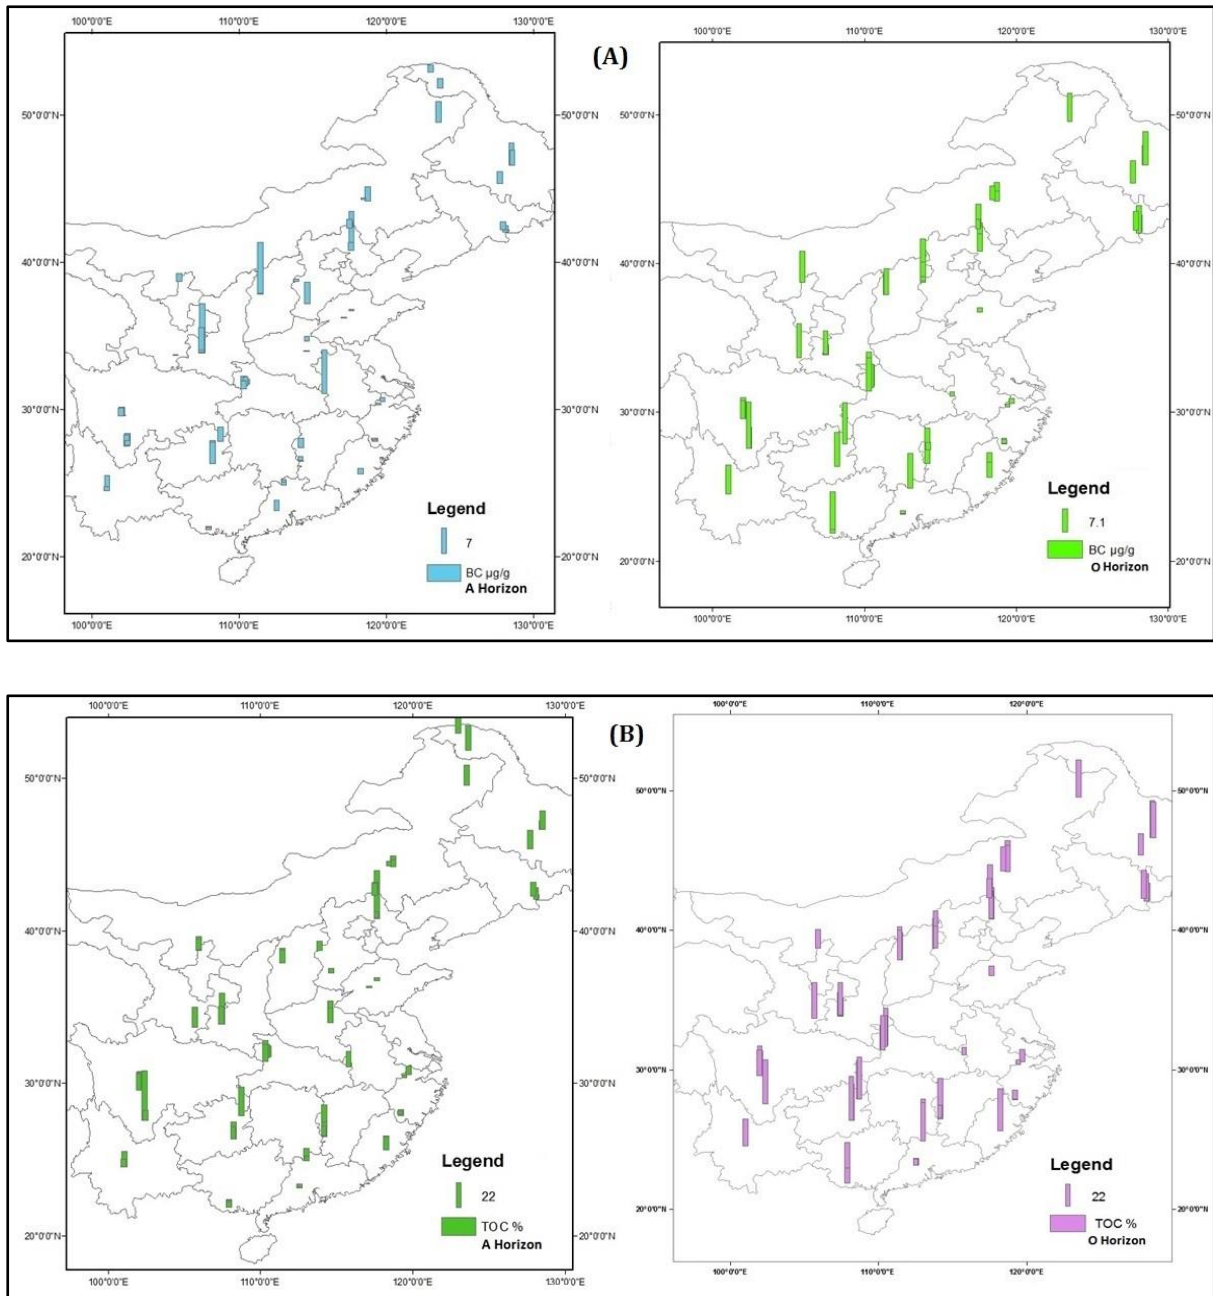

**Figure S3: Spatial distribution of BC (A) and TOC (B) in the studied soil samples. (The background map was made using ArcGIS 9.3 by one co-author)**

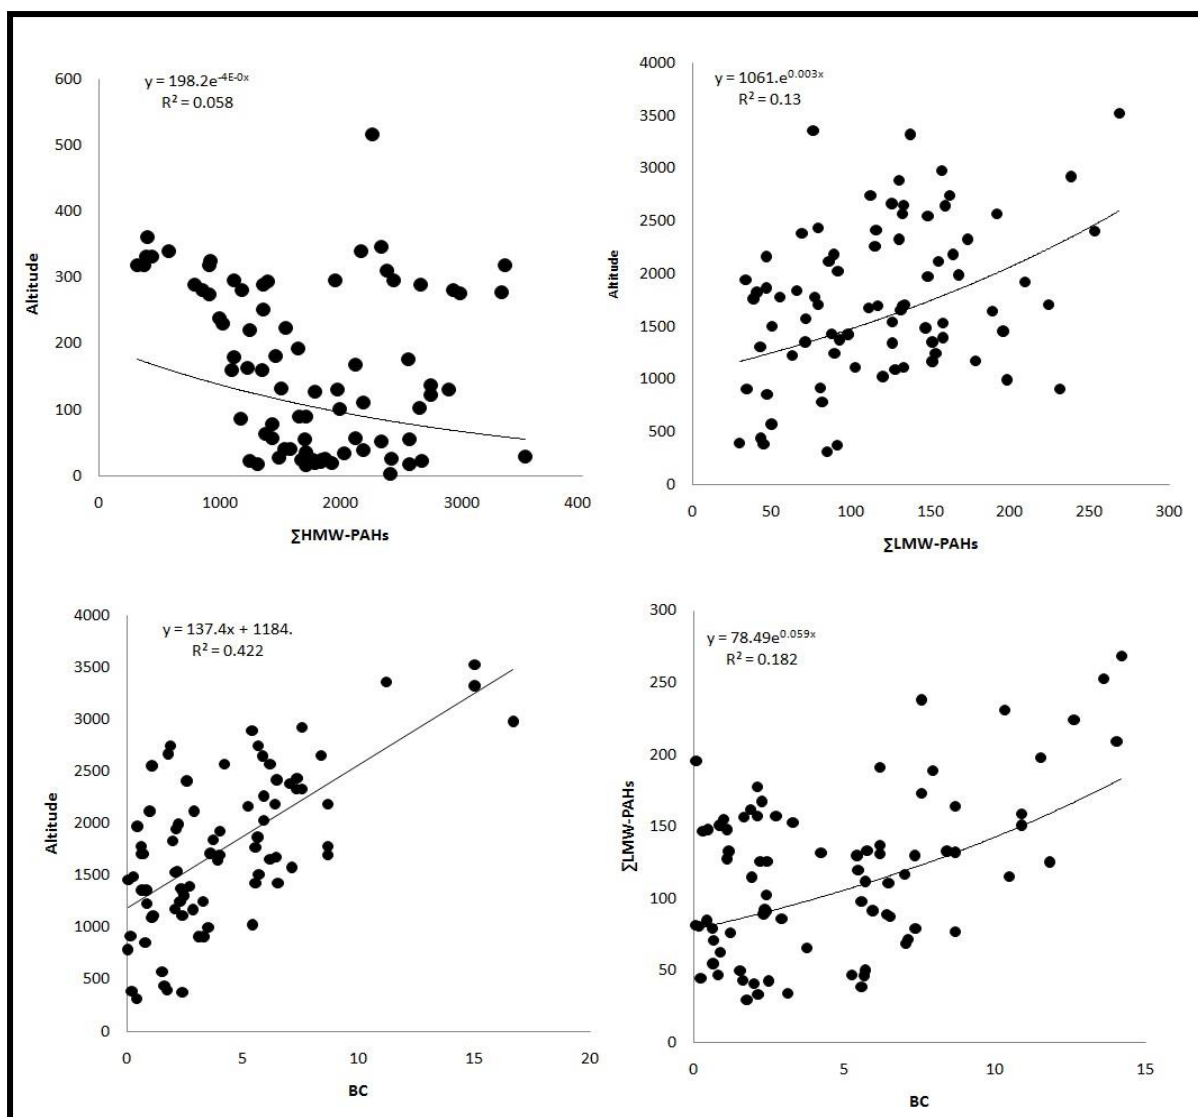

**Figure S4: Topographic deposition trend of LMW vs. HMW-PAHs in Chinese forest soil**

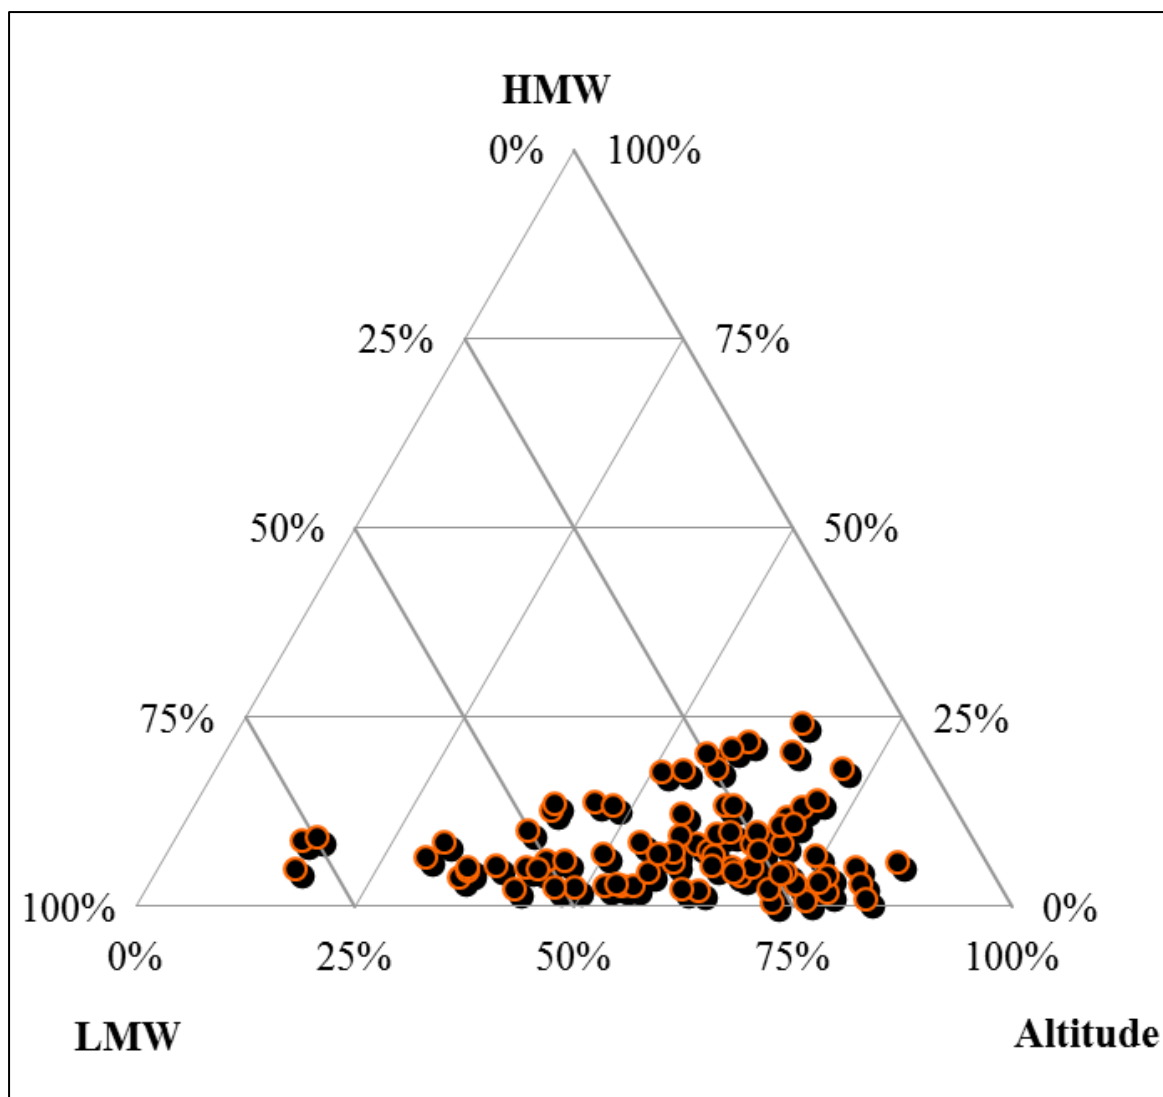

**Figure S5: Triangular of Altitude distribution (in percentage) of the LMW and HMW- PAHs**

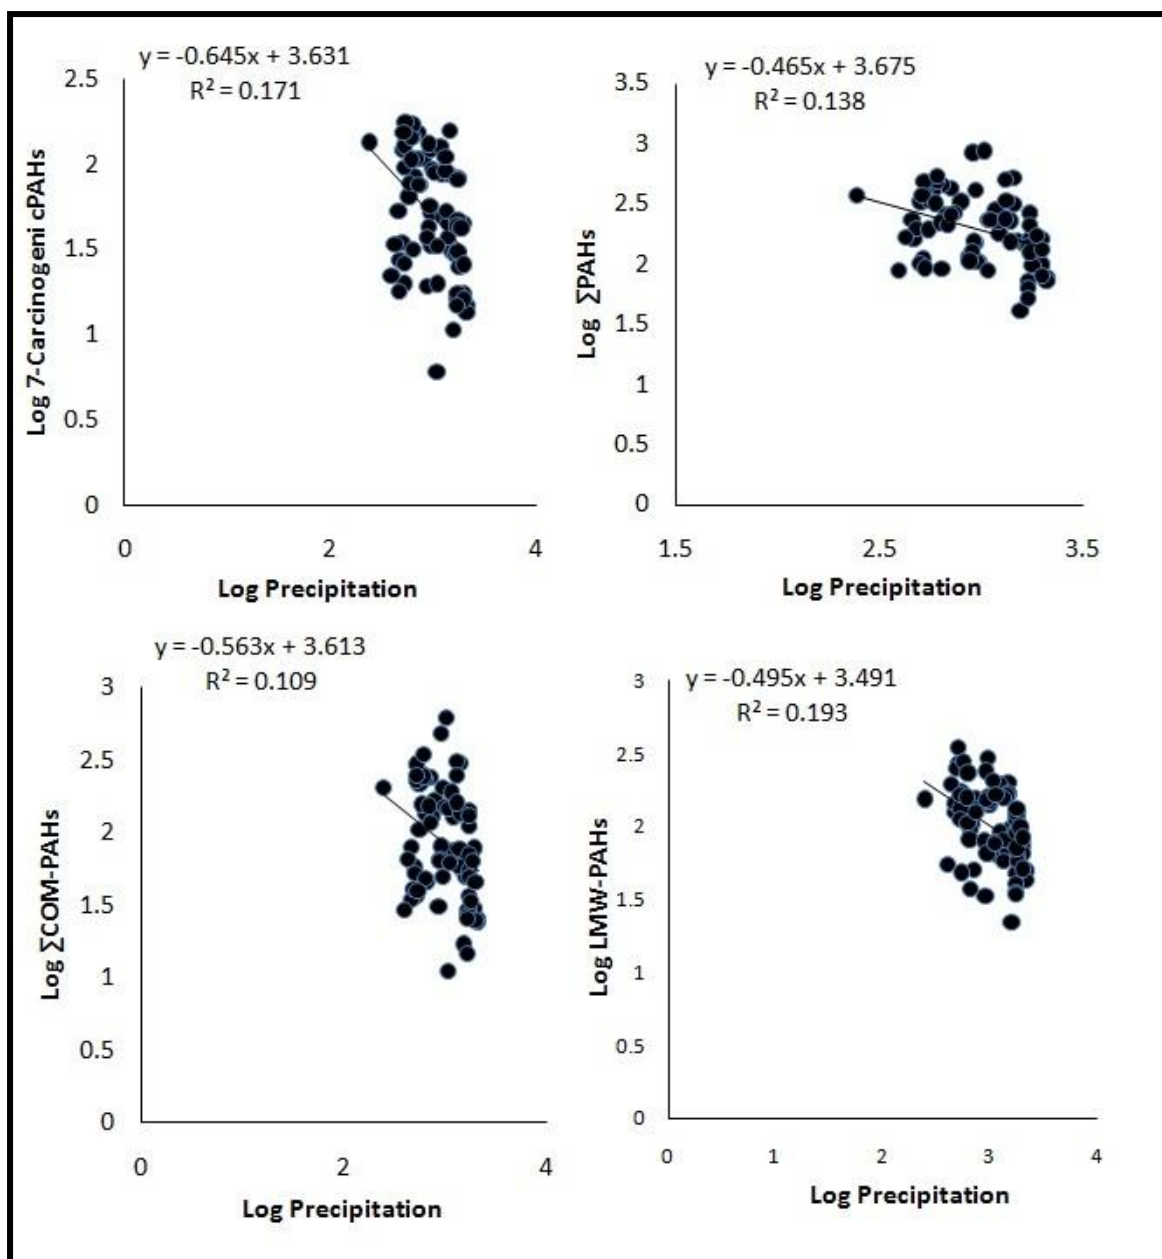

**Figure S6: Influence of precipitation pattern on the distribution of PAHs**

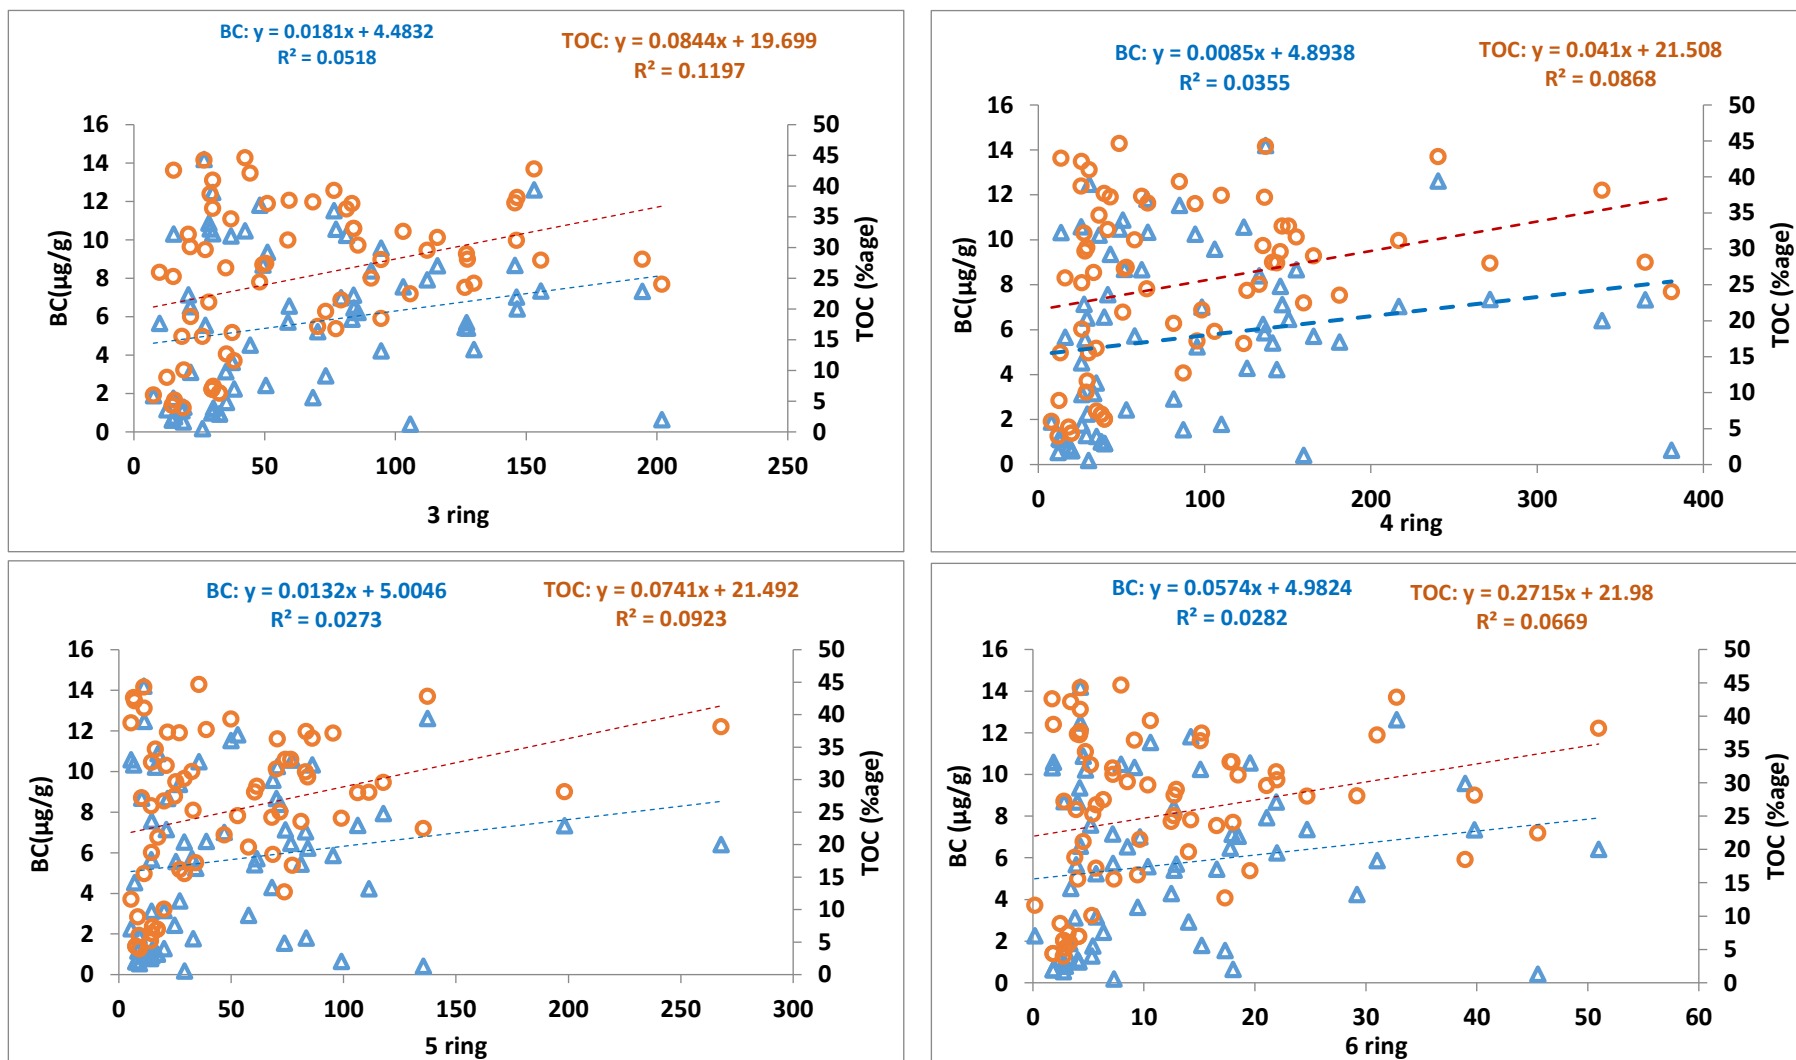

Figure S7 (a): Regression plots of TOC and BC against PAH benzene ring numbers for O- Layer soils



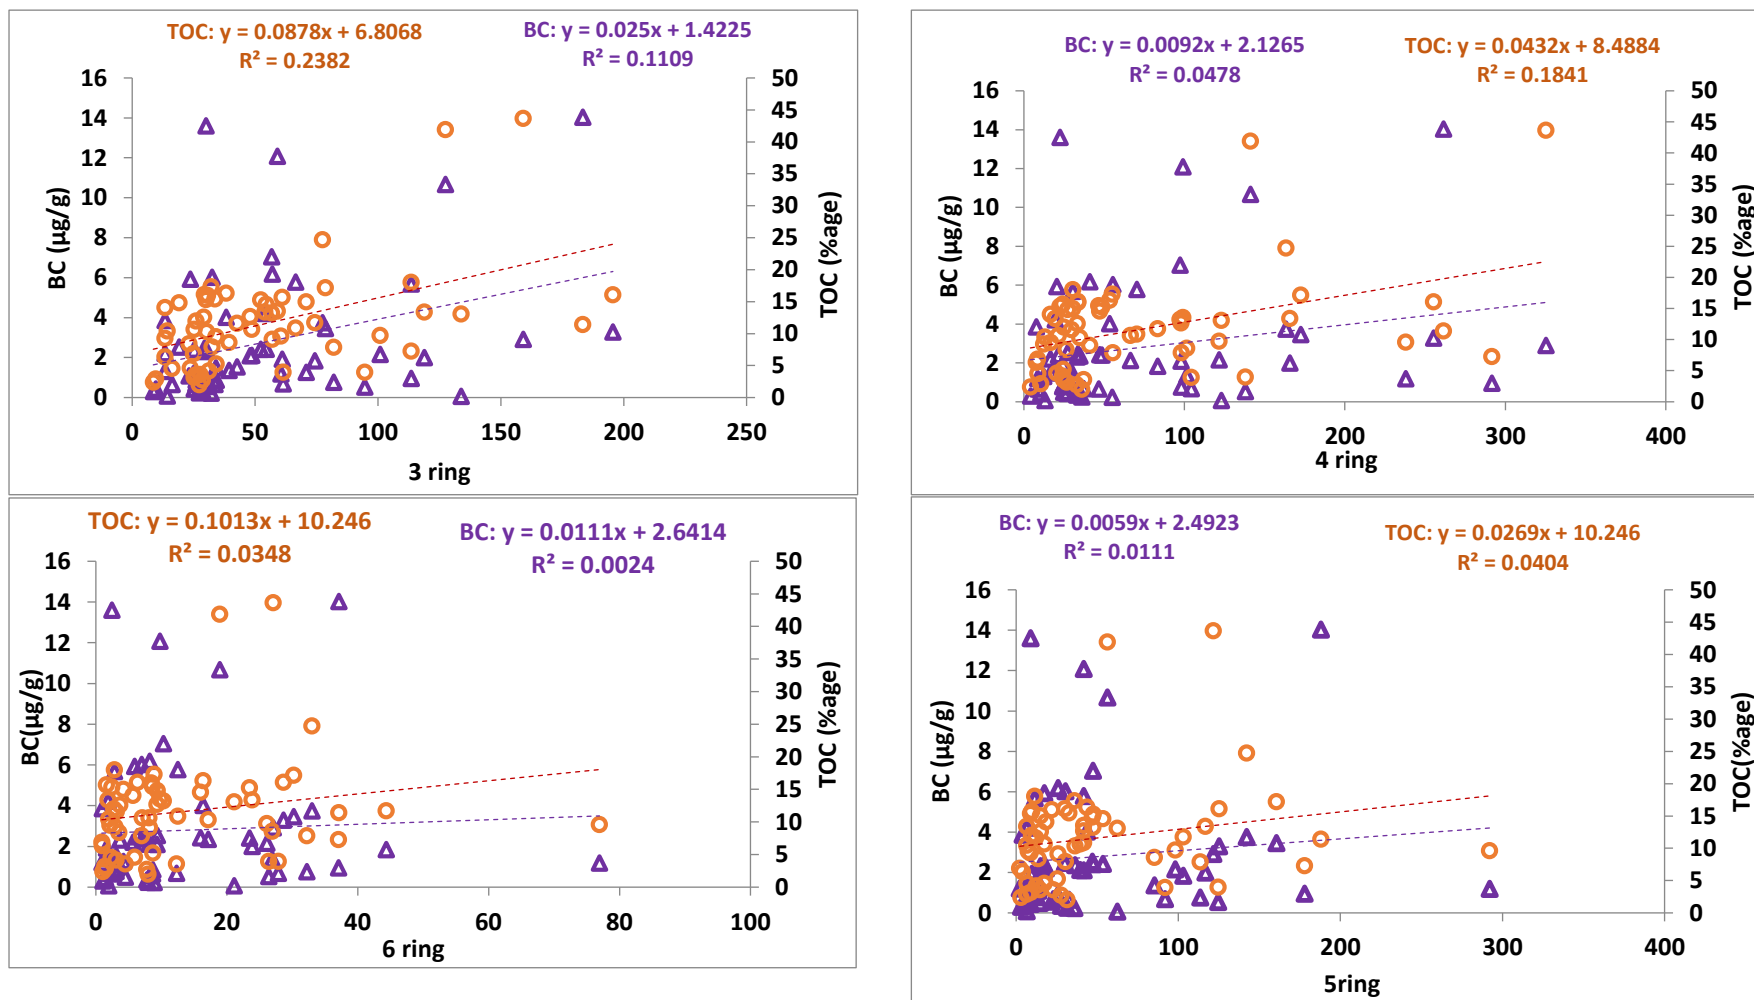

Figure S7 (b): Regression plots of TOC and BC against PAH benzene ring numbers for A- Layer soil

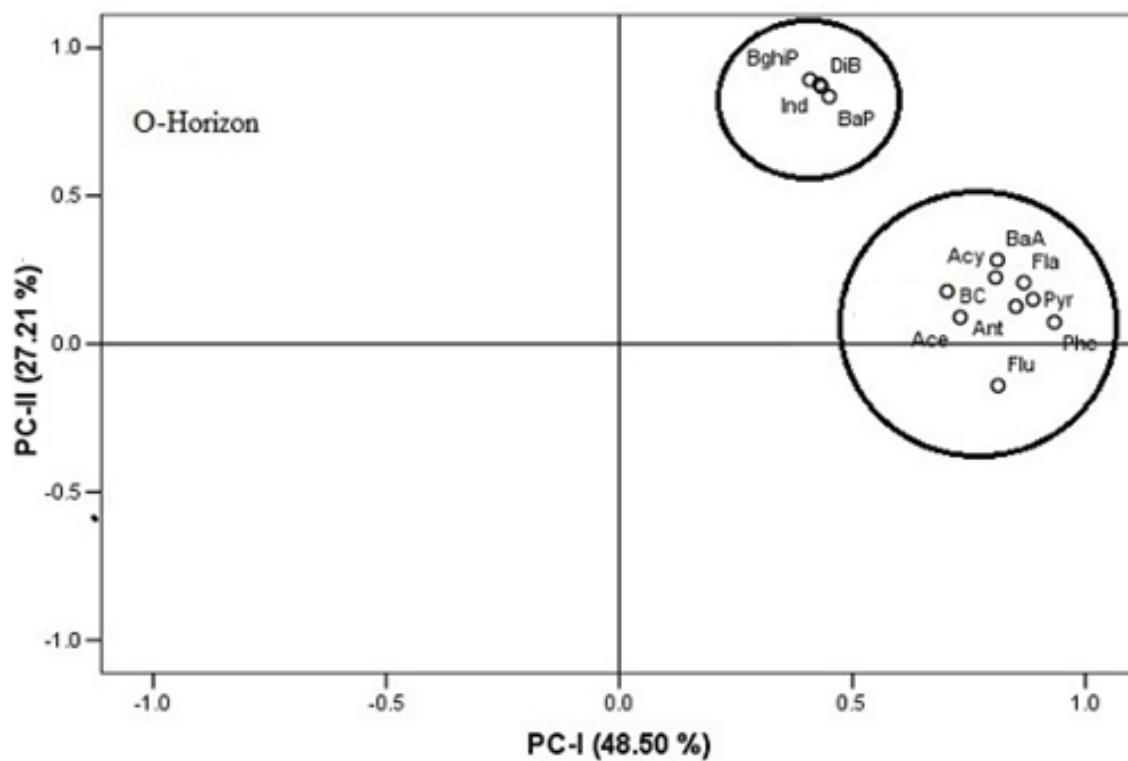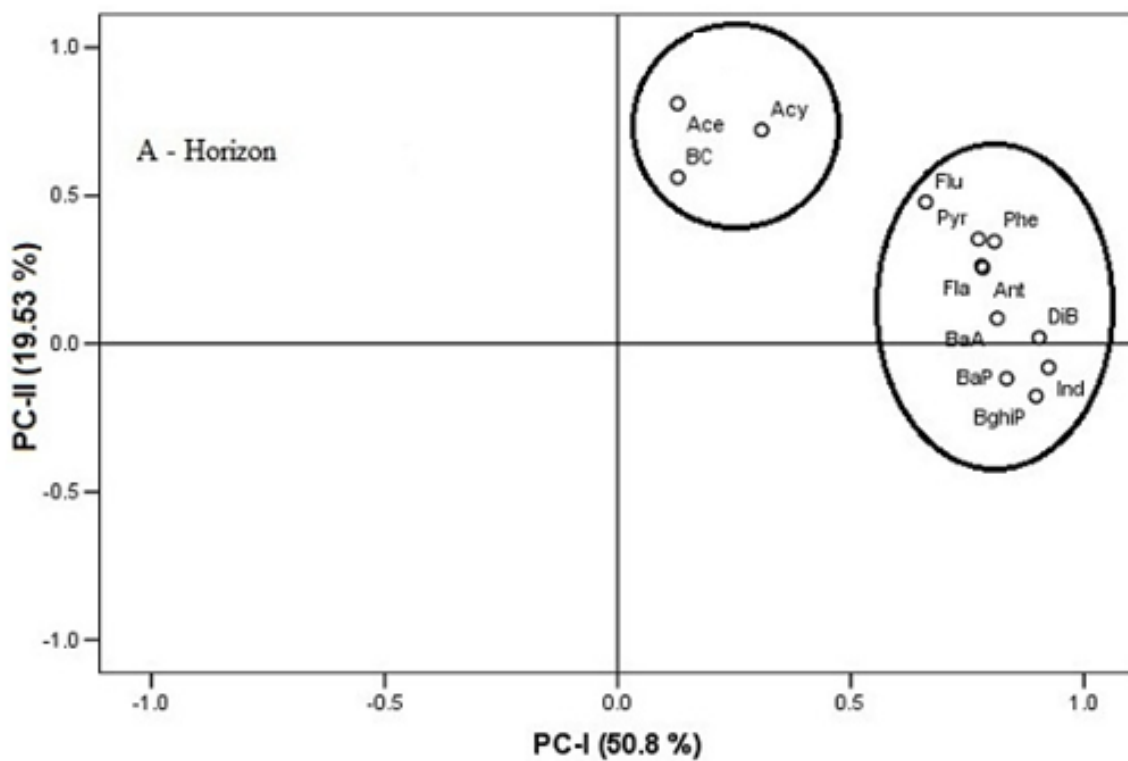

Figure S8: PCA bi-plot of PAHs congeners and BC contents in O- & A-horizon in soils of Chinese forests

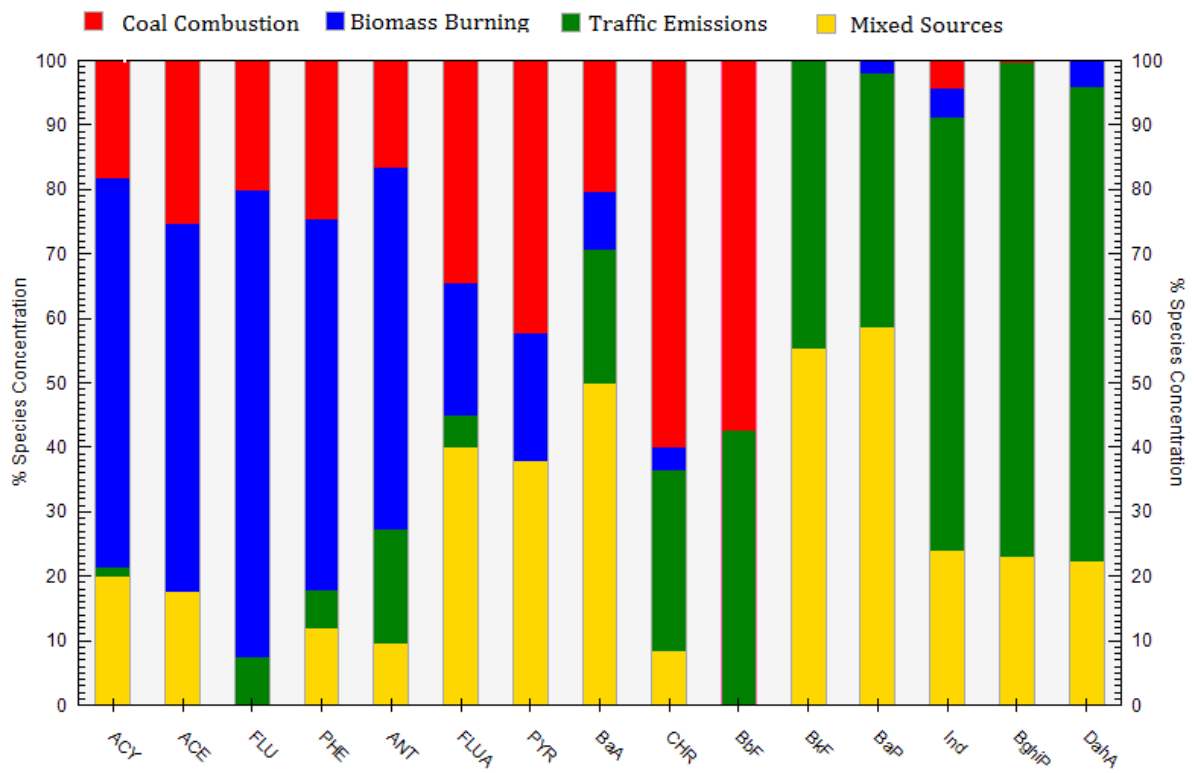

**Figure S9: Fingerprints of four factor profiles on each PAHs congener in Chinese forests**

**Table S2: Comparison of PAH concentrations (ng g<sup>-1</sup>dry weight) in the mountainous soils of different regions**

| Country                                              | Sampling site                      | Sampling year | Total PAH | PAHs (ng g <sup>-1</sup> )    | Reference                           |
|------------------------------------------------------|------------------------------------|---------------|-----------|-------------------------------|-------------------------------------|
| <b>UK<br/>Norway</b>                                 | Remote woodland                    | 1998          | 15        | 580 (42–4850)<br>243 (42–750) | (Nam et al., 2008) <sup>5</sup>     |
| <b>Austria</b>                                       | Remote forest                      | 1993          | 16        | 210 <sup>a</sup> (68–1342)    | (Weiss et al., 2000) <sup>6</sup>   |
| <b>Switzerland</b>                                   | Forest                             | 2002          | 16        | 251 (98–578)                  | (Bucheli et al., 2004) <sup>7</sup> |
| <b>Brazil</b>                                        | Tropical Forest<br>Top-soil        | 2001          | 21        | 32                            | (Krauss et al., 2005) <sup>8</sup>  |
| <b>Germany</b>                                       | Forest Soils                       | 2013          | 16        | 105-14889                     | (Ainer et al., 2013) <sup>9</sup>   |
| <b>Pearl River<br/>Delta,<br/>Southern<br/>China</b> | Urban, Sub-Urban,<br>Rural-Forests | 2013          | 16        | 152, 74, 26                   | (Xiao et al., 2014) <sup>10</sup>   |
| <b>China</b>                                         | Forest Soils<br>O-layer<br>A-layer | 2013          | 15        | 222 (28-804)<br>168 (10-670)  | This study                          |

<sup>a</sup> median of PAHs Concentrations

**Table S3: General Topographic distributions of PAHs and BC in the forest cover of China**

| Elevation            | >2000m                  |          | 500-2000m              |          | <500m      |          |
|----------------------|-------------------------|----------|------------------------|----------|------------|----------|
|                      | Mean±SD                 | Min-Max  | Mean±SD                | Min-Max  | Mean±SD    | Min-Max  |
| Acy                  | 2±1                     | 0.7-5.5  | 3.1±1.7                | 0.6-15.5 | 2.2±0.9    | 0.4-8    |
| Ace                  | 3.3±1.7                 | 0.5-16.6 | 3±2.9                  | 0.4-19.6 | 2.3±2.8    | 0.2-13.7 |
| Flu                  | 6.4 <sup>a</sup> ±1.8   | 1.3-21   | 11.7±7.5               | 2.1-32   | 5.6±1.8    | 0.8-276  |
| Phe                  | 38 <sup>a</sup> ±16.9   | 6.3-163  | 55 <sup>b</sup> ±21    | 7.6-148  | 31±17.3    | 4.9-144  |
| Ant                  | 2.8 <sup>a</sup> ±1     | 0.5-9    | 5 <sup>b</sup> ±3.3    | 0.7-15   | 2.6±1.4    | 0.6-10   |
| Fla                  | 45 <sup>a</sup> ±23     | 4.3-216  | 39 <sup>b</sup> ±8     | 3.3-149  | 27.9±11    | 3.6-132  |
| Pyr                  | 19.7±150                | 2.6-110  | 22 <sup>b</sup> ±13    | 1.9-77   | 15.2±6.8   | 1.8-72.5 |
| BaA                  | 9±5.4                   | 1-43.7   | 13.5 <sup>b</sup> ±5   | 1.1-64   | 8.1±5.4    | 0.5-62.3 |
| Chr                  | 16.7±11                 | 0.8-91   | 16 <sup>b</sup> ±12    | 1.4-96   | 8.4±3.8    | 0.5-46.5 |
| BbF                  | 22 <sup>c</sup> ±16     | 0.6-120  | 19 <sup>b</sup> ±11    | 1.6-94   | 9.6±4.4    | 0.7-42   |
| BkF                  | 9±1.8                   | 0.1-49   | 9 <sup>b</sup> ±7.2    | 0.1-26   | 5.7±3.7    | 0.5-52   |
| BaP                  | 12 <sup>c</sup> ±7.1    | 0.2-69   | 10 <sup>b</sup> ±8.4   | 0.1-29   | 6.2±2.7    | 0.5-62   |
| Ind                  | 15±6.8                  | 0.9-77   | 14.9 <sup>b</sup> ±7   | 0.2-46   | 7.9±4      | 0.9-37   |
| BghiP                | 7.8 <sup>c</sup> ±4     | 0.3-47   | 6.9 <sup>b</sup> ±6.2  | 0.1-22   | 3.7±1.8    | 0.5-21   |
| DahA                 | 11.9±4                  | 0.6-71   | 11.9 <sup>b</sup> ±8.8 | 0.2-49   | 6.3±2.3    | 0.7-35   |
| ∑ <sub>16</sub> PAHs | 276±56                  | 87.9-865 | 296 <sup>b</sup> ±163  | 53.9-870 | 189±60     | 24.9-721 |
| ∑LMW-PAHs            | 107 <sup>c</sup> ±221.9 | 33.6-340 | 131 <sup>b</sup> ±58   | 29.9-268 | 90±221.7   | 8.2-312  |
| ∑HMW-PAHs            | 124 <sup>c</sup> ±48    | 7.4-516  | 125 <sup>b</sup> ±94   | 17.9-454 | 71.1±276.7 | 7.5-375  |
| TOC                  | 20.5±6                  | 2.9-44   | 21.5 <sup>b</sup> ±5.9 | 3.6-45   | 15.2±5.2   | 2.4-42.6 |
| BC                   | 4.8±1.4                 | 0.1-14   | 4.9 <sup>b</sup> ±1.5  | 0.5-14   | 3.5±0.8    | 0.1-12.5 |

<sup>a</sup>Significantly higher in >2000m, <sup>b</sup> Significantly higher at altitude between 500 and 2000 m, <sup>c</sup>Significantly higher at >2000 than at 500

**Table S4: Forest based ∑PAHs (ng/g) distribution in Chinese forest soils**

|      | Coniferous forest | Broad-leaved | Theropencedrymion | Birch | Mesophorbium | Macrophanerophytes | Bamboo | Dahurian larch |
|------|-------------------|--------------|-------------------|-------|--------------|--------------------|--------|----------------|
| Min  | 751               | 25           | 72                | 191   | -            | -                  | -      | -              |
| Max  | 4539              | 3601         | 2684              | 2587  | -            | -                  | -      | -              |
| Mean | 2163              | 1509         | 1566              | 1600  | 1763         | 143                | 831    | 2356           |
| SD   | 900               | 945          | 598               | 793   | -            | -                  | -      | -              |

**Table S5: Pearson correlations based on molecular weight PAHs versus BC and TOC**

| <b>O-Layer</b>       | <b>TOC</b> | <b>BC</b> | <b>LMW</b> | <b>HMW</b> | <b>Precipitation</b> | <b>Temperature</b> |
|----------------------|------------|-----------|------------|------------|----------------------|--------------------|
| <b>TOC</b>           | 1          |           |            |            |                      |                    |
| <b>BC</b>            | 0.767**    | 1         |            |            |                      |                    |
| <b>LMW</b>           | 0.497**    | 0.411**   | 1          |            |                      |                    |
| <b>HMW</b>           | 0.307*     | 0.186     | 0.769**    | 1          |                      |                    |
| <b>A-Layer</b>       | <b>TOC</b> | <b>BC</b> | <b>LMW</b> | <b>HMW</b> |                      |                    |
| <b>TOC</b>           | 1          |           |            |            |                      |                    |
| <b>BC</b>            | 0.370**    | 1         |            |            |                      |                    |
| <b>LMW</b>           | 0.189      | 0.630**   | 1          |            |                      |                    |
| <b>HMW</b>           | 0.332*     | 0.155     | 0.158      | 1          |                      |                    |
| <b>Precipitation</b> | -0.1       | -0.144    | 0.156      | 0.8        | 1                    |                    |
| <b>Temperature</b>   | 0.560**    | -0.65     | 0.142      | 0.15       | 0.672**              | 1                  |

\*\* p< 0.01 \* p< 0.05

## References

- 1 Chen, L. *et al.* PBDEs in sediments of the Beijiang River, China: levels, distribution, and influence of total organic carbon. *Chemosphere* **76**, 226-231 (2009).
- 2 Elmquist, M., Semiletov, I., Guo, L. & Gustafsson, Ö. Pan-Arctic patterns in black carbon sources and fluvial discharges deduced from radiocarbon and PAH source apportionment markers in estuarine surface sediments. *Global Biogeochemical Cycles* **22** (2008).
- 3 Gustafsson, Ö. *et al.* Evaluation of a protocol for the quantification of black carbon in sediments. *Global Biogeochemical Cycles* **15**, 881-890 (2001).
- 4 Elmquist, M., Zencak, Z. & Gustafsson, Ö. A 700 year sediment record of black carbon and polycyclic aromatic hydrocarbons near the EMEP air monitoring station in Aspövreten, Sweden. *Environmental science & technology* **41**, 6926-6932 (2007).
- 5 Nam, J. J. *et al.* PAHs in background soils from Western Europe: influence of atmospheric deposition and soil organic matter. *Chemosphere* **70**, 1596-1602 (2008).
- 6 Weiss, P., Lorbeer, G. & Scharf, S. Regional aspects and statistical characterisation of the load with semivolatile organic compounds at remote Austrian forest sites. *Chemosphere* **40**, 1159-1171 (2000).
- 7 Bucheli, T. D., Blum, F., Desaulles, A. & Gustafsson, Ö. Polycyclic aromatic hydrocarbons, black carbon, and molecular markers in soils of Switzerland. *Chemosphere* **56**, 1061-1076 (2004).
- 8 Krauss, M. *et al.* Atmospheric versus biological sources of polycyclic aromatic hydrocarbons (PAHs) in a tropical rain forest environment. *Environmental Pollution* **135**, 143-154 (2005).
- 9 Aichner, B., Bussian, B., Lehnik-Habrink, P. & Hein, S. Levels and spatial distribution of persistent organic pollutants in the environment: a case study of German forest soils. *Environmental science & technology* **47**, 12703-12714 (2013).
- 10 Xiao, Y., Tong, F., Kuang, Y. & Chen, B. Distribution and source apportionment of polycyclic aromatic hydrocarbons (PAHs) in forest soils from urban to rural Areas in the Pearl River delta of Southern China. *International journal of environmental research and public health* **11**, 2642-2656 (2014).
